# Supplementary material for: Enhanced removal of fluoride by zirconium modified tea waste with extrusion treatment: kinetics and mechanism
Source: Royal Society of Chemistry journal article supplement (doi:10.1039/c9ra07155e), 2019-01-01
Supplement: c9ra07155e1.pdf [file c9ra07155e1.pdf]

## Supplementary data

# Enhanced removal of fluoride by zirconium modified tea waste with extrusion treatment: kinetics and mechanism

Liping Mei<sup>1</sup>, Chuanyi Peng<sup>1</sup>, Huanhuan Qiao, Fei Ke, Ruyan Hou, Huimei Cai\*,

Xiaochun Wan\*

School of Tea & Food Science and Technology, Anhui Agricultural University/State Key Laboratory of Tea Plant Biology and Utilization, Hefei 230036, Anhui, People's Republic of China

1. Liping Mei and Chuanyi Peng contributed equally to this work

\*Corresponding author:

E-mail: hml20@sina.com (H. Cai)

xcwan@ahau.edu.cn (X. Wan)

Postal address: No.130 Changjiangxi Road, Hefei, Anhui, P.R. China, 230036

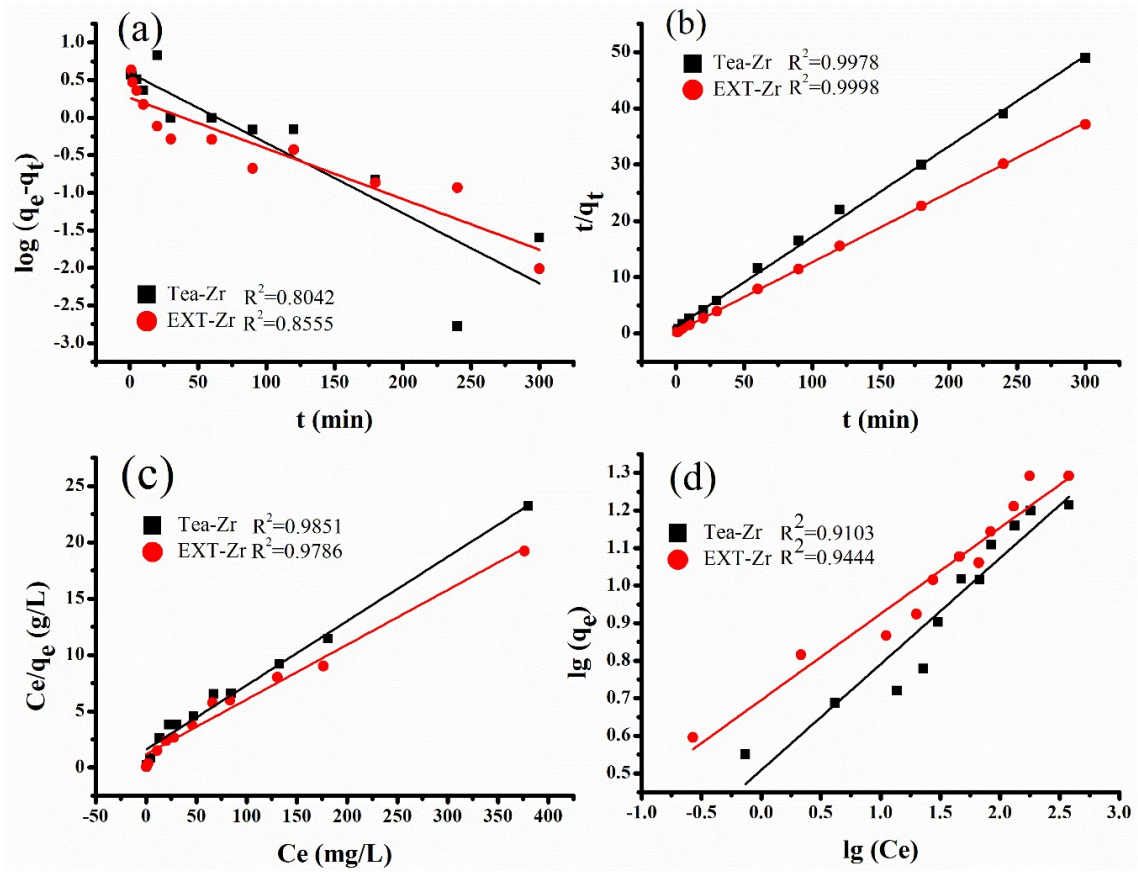

Fig. S1. The pseudo-first order kinetic model (a), pseudo-second order kinetic model (b), Langmuir isotherm (c) the Freundlich isotherm (d) for fluoride adsorption by tea waste with zirconium (Tea-Zr) and extruded with zirconium (EXT-Zr).

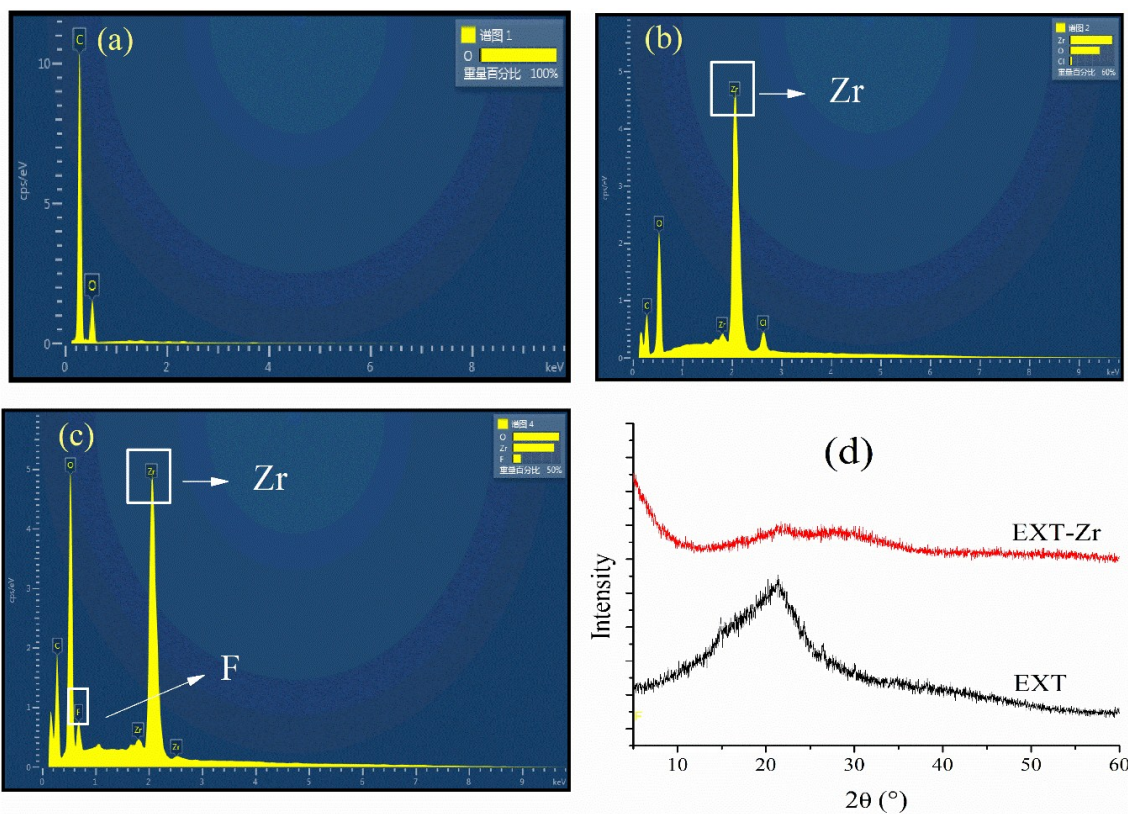

Fig S2. EDS spectra of the EXT (a), EXT-Zr (b) and EXT-Zr-F (c) and X-ray diffractometry (XRD) of EXT (black, below) and EXT-Zr (red, above) (d).

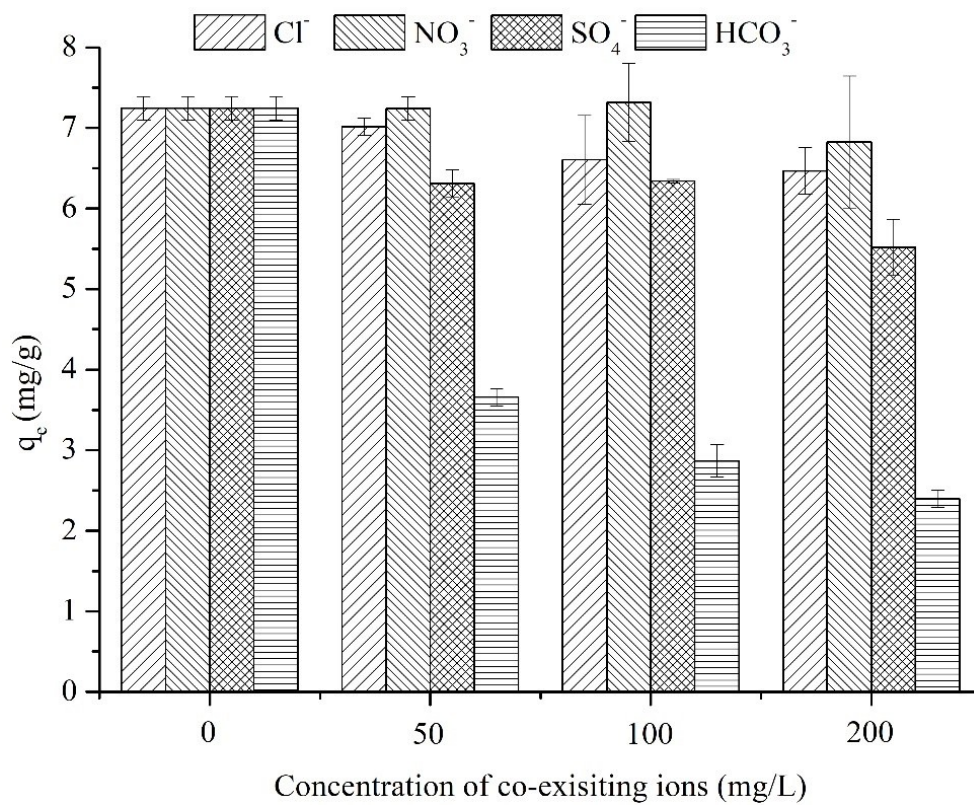

Fig. S3. The effects of co-existing ions in the aqueous solution on the fluoride adsorption capacity ( $q_e$ ) of the EXT-Zr.

Table S1. Elemental concentrations on the surfaces of EXT, EXT-Zr and EXT-Zr-F obtained from XPS analysis.

| Samples   | Atomic ratio % |       |      |   |       |
|-----------|----------------|-------|------|---|-------|
|           | C              | O     | Zr   | F | Total |
| EXT       | 78.01          | 21.99 | 0    | 0 | 100   |
| EXT -Zr   | 62.43          | 31.55 | 6.02 | 0 | 100   |
| EXT -Zr-F | 59.6           | 32.6  | 5.8  | 2 | 100   |
